# Supplementary material
Source: publisher site journal article supplement (https://www.spandidos-publications.com/3182/downloadSupplementary)

Figure S1. Efficiency of transfection. Efficiency of (A) si-Cox2, (B) mimics miR-150, (C) inhibitor miR-150, (D) si-Cox2 and inhibitor miR-150 in chondrocytes when co-transfected with si-Cox2 and miR-150 inhibitors. \*P<0.05. linc, long intergenic non-coding; si, small interfering; NC, negative control; miR, microRNA.

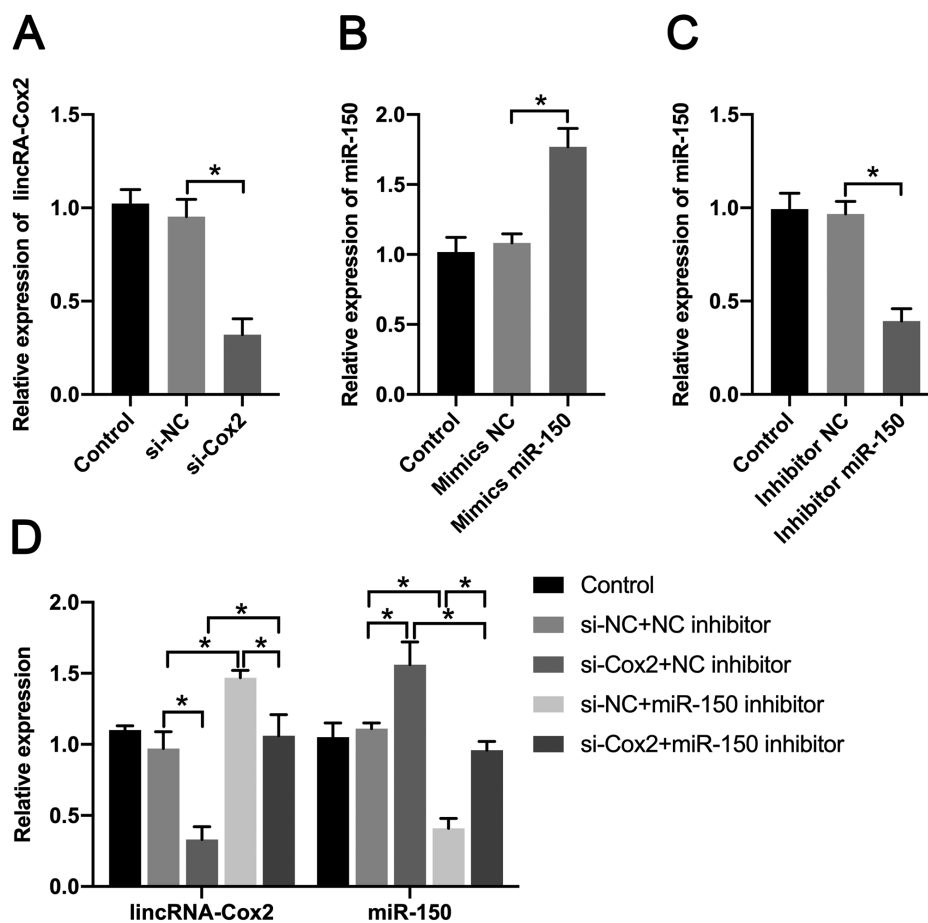

Supplement: Supplementary file 1 [file downloadSupplementary]
